# Supplementary material
Source: PubMed Central journal article supplement (PMC3557034)
Supplement: 1220978110_pnas.201220978SI.pdf [file 1220978110_pnas.201220978SI.pdf]

# Supporting Information

Thayer et al. 10.1073/pnas.1220978110

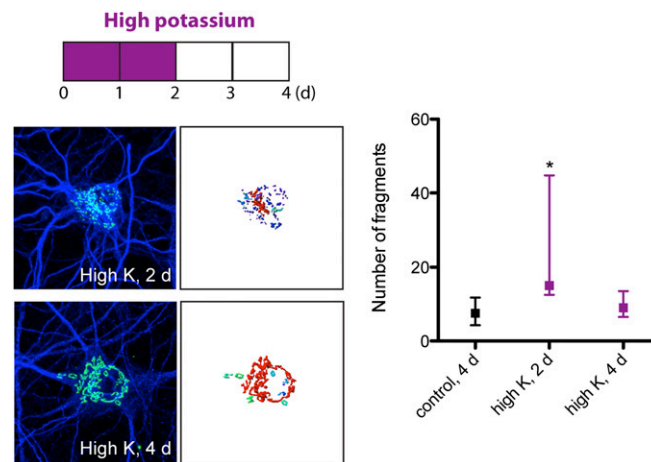

**Fig. S1.** Neurons were cultured in normal medium for 14 d, then changed to hyperexcitable conditions (high K) for 2 d, and finally returned to normal medium for 2 d. Immunostaining with anti-GM130 (green) and anti-MAP2 (blue) with 3D reconstruction of anti-GM130 signal. Quantification of the number of distinct Golgi fragments from reconstructed anti-GM130 fluorescent signal. Data shown are median and IR (control,  $n = 12$ ; high K, 2 d,  $n = 12$ ; high K, 4 d,  $n = 13$ ).
